# Supplementary material for: Chromophobe cell renal carcinomaの1例
Source: Royal Society of Chemistry journal article supplement (doi:10.1039/d0nr04645k), 1997-11-01
Supplement: d0nr04645k1.pdf [file d0nr04645k1.pdf]

## Supporting Information

### Red-Emitting GSH-Cu NCs as Triplet Induced Quenched Fluorescent Probe for Fast Detection of Thiol Pollutants

Jun-Hua Zhang<sup>a,b</sup>, Zi-Tong Zhang<sup>a</sup>, Yang-Jing Ou<sup>a</sup>, Fei Zhang<sup>a,b\*</sup>, Jie Meng<sup>b</sup>, Gen Wang<sup>b</sup>, Zhao-Lin Fang<sup>a</sup>, and Yan Li<sup>a\*</sup>

*a. Tianjin Key laboratory of Structure and Performance for Functional Molecules, MOE Key Laboratory of Inorganic-Organic Hybrid Functional Material Chemistry, College of Chemistry, Tianjin Normal University, 393 Binshui West Road, Tianjin 300387, PR China. E-mail: hxxyzf@tjnu.edu.cn (F. Zhang), nkliyan398@gmail.com (Y. Li).*

*b. State Environmental Protection Key Laboratory of Odor Pollution Control, Tianjin Academy of Environmental Sciences, Tianjin 300191, PR China.*

\*Corresponding authors E-mail address: hxxyzf@tjnu.edu.cn (F. Zhang).

nkliyan398@gmail.com (Y. Li).

## Supporting Tables

**Table S1** Analytical results for the detection of MPA in water samples

| <b>Samples</b>        | <b>Spiked (nm)</b> | <b>Measured (nm)</b> | <b>Recovery (%)</b> | <b>RSD (n=3,%)</b> |
|-----------------------|--------------------|----------------------|---------------------|--------------------|
| <b>Water sample-1</b> | 0                  | nd*                  | -                   | -                  |
|                       | 5                  | 4.68±0.25            | 93%                 | 0.051              |
|                       | 30                 | 30.36±1.46           | 101%                | 0.040              |
|                       | 80                 | 84.62±1.32           | 105%                | 0.016              |
| <b>Water sample-2</b> | 0                  | nd                   | -                   | -                  |
|                       | 5                  | 4.76±0.24            | 95%                 | 0.049              |
|                       | 30                 | 29.88±2.02           | 99%                 | 0.067              |
|                       | 80                 | 82.09±0.97           | 102%                | 0.012              |
| <b>Water sample-3</b> | 0                  | nd                   | -                   | -                  |
|                       | 5                  | 4.89±0.15            | 97%                 | 0.031              |
|                       | 30                 | 29.20±0.52           | 97%                 | 0.017              |
|                       | 80                 | 81.09±0.65           | 101%                | 0.010              |

\*Not detected

**Table S2 Analytical results for the detection of 2-AT in water samples**

| <b>Samples</b>        | <b>Spiked (nm)</b> | <b>Measured (nm)</b> | <b>Recovery (%)</b> | <b>RSD (n=3,%)</b> |
|-----------------------|--------------------|----------------------|---------------------|--------------------|
| <b>Water sample-1</b> | 0                  | nd*                  | -                   | -                  |
|                       | 5                  | 5.45±1.93            | 109%                | 0.380              |
|                       | 30                 | 28.30±1.35           | 94%                 | 0.040              |
|                       | 80                 | 79.97±0.75           | 99%                 | 0.009              |
| <b>Water sample-2</b> | 0                  | nd                   | -                   | -                  |
|                       | 5                  | 5.38±0.79            | 107%                | 0.150              |
|                       | 30                 | 29.19±0.27           | 97%                 | 0.070              |
|                       | 80                 | 80.22±0.64           | 100%                | 0.008              |
| <b>Water sample-3</b> | 0                  | nd                   | -                   | -                  |
|                       | 5                  | 4.99±0.43            | 99%                 | 0.080              |
|                       | 30                 | 29.72±1.52           | 99%                 | 0.050              |
|                       | 80                 | 78.72±1.21           | 98%                 | 0.015              |

\*Not detected

**Table S3** Analytical results for the detection of TGA in water samples

| <b>Samples</b>        | <b>Spiked (nm)</b> | <b>Measured (nm)</b> | <b>Recovery (%)</b> | <b>RSD (n=3,%)</b> |
|-----------------------|--------------------|----------------------|---------------------|--------------------|
| <b>Water sample-1</b> | 0                  | nd*                  | -                   | -                  |
|                       | 5                  | 5.13±0.56            | 102%                | 0.110              |
|                       | 30                 | 31.22±0.28           | 104%                | 0.009              |
|                       | 80                 | 79.86±0.78           | 99%                 | 0.010              |
| <b>Water sample-2</b> | 0                  | nd                   | -                   | -                  |
|                       | 5                  | 5.18±1.05            | 103%                | 0.210              |
|                       | 30                 | 30.94±0.96           | 103%                | 0.032              |
|                       | 80                 | 80.24±0.49           | 100%                | 0.006              |
| <b>Water sample-3</b> | 0                  | nd                   | -                   | -                  |
|                       | 5                  | 5.20±1.67            | 104%                | 0.334              |
|                       | 30                 | 31.91±1.12           | 106%                | 0.037              |
|                       | 80                 | 81.36±0.93           | 101%                | 0.011              |

\*Not detected

**Table S4** Analytical results for the detection of ME in water samples

| <b>Samples</b>        | <b>Spiked (nm)</b> | <b>Measured (nm)</b> | <b>Recovery (%)</b> | <b>RSD (n=3,%)</b> |
|-----------------------|--------------------|----------------------|---------------------|--------------------|
| <b>Water sample-1</b> | 0                  | nd*                  | -                   | -                  |
|                       | 5                  | 4.68±0.06            | 93%                 | 0.013              |
|                       | 30                 | 30.16±1.02           | 100%                | 0.034              |
|                       | 80                 | 79.21±0.22           | 99%                 | 0.002              |
| <b>Water sample-2</b> | 0                  | nd                   | -                   | -                  |
|                       | 5                  | 4.97±0.92            | 99%                 | 0.184              |
|                       | 30                 | 31.33±1.03           | 104%                | 0.035              |
|                       | 80                 | 78.23±0.19           | 97%                 | 0.035              |
| <b>Water sample-3</b> | 0                  | nd                   | -                   | -                  |
|                       | 5                  | 4.86±0.60            | 97%                 | 0.121              |
|                       | 30                 | 30.45±1.29           | 101%                | 0.043              |
|                       | 80                 | 79.35±0.89           | 99%                 | 0.011              |

\*Not detecte
